# Supplementary material
Source: PubMed Central journal article supplement (PMC3638350)
Supplement: neo1505_0472SD1.pdf [file neo1505_0472SD1.pdf]

**Table W1.** Primer Sequences for qPCR.

| Gene                            | Forward Primer (5' to 3') | Reverse Primer (5' to 3') |
|---------------------------------|---------------------------|---------------------------|
| <i>TATA box-binding protein</i> | TGTACCGCAGCTGCAAAAT       | GGATTATATTCAGCGTTTCG      |
| <i>KLF5</i>                     | ACCCTGGTTGCACAAAAGTT      | CAGCCTTCCCAGGTACACTT      |
| <i>BAX</i>                      | ACTTTGCCAGCAAAGTGGTG      | GGAGGAAGTCCAATGTCCAG      |
| <i>ASK1</i>                     | CCTAGCCAATGACCACATGA      | GACCAGGAAATCCATCCAAA      |
| <i>MKK4</i>                     | TGGAGAAATTGGACGAGGAG      | GGCAATCACTACTCCGCATT      |
| <i>MKK7</i>                     | GTCCCTCCCTGGAACAGAAGC     | GGGAGCTCTTGAGGATGG        |
| <i>TP53</i>                     | AGGCCTTGGAAGTCAAGGAT      | TTATGGCGGGAGGTAGACTG      |
| <i>TP73</i>                     | CACCTCCAAGGTTACAGA        | GTACTGCTCGGGATCTTCA       |
| <i>14-3-3</i>                   | AGAAAGTGGAGTCCGAGCTG      | CCGGAAGTAATCACCCCTCA      |
| <i>BCL2</i>                     | GCCCTGTGGATGACTGAGTA      | GGCCGTACAGTCCACAAAG       |
| <i>MDM2</i>                     | GGTGCTGTAACCACCTCACA      | TTTTTGTGCACCAACAGACTTT    |
| <i>NOXA</i>                     | CACGCTGCCATCGACTAC        | CCGACGCCACATTGTGTA        |
| <i>PUMA</i>                     | GACGACCTCAACGCACAGTA      | AGGAGTCCCATGATGAGATTGT    |
| <i>DR5</i>                      | CCCACAACAAAAGAGGTCCA      | CCTGTCCATATTTGCAGGAGA     |
| <i>GADD45A</i>                  | GAGCTCCTGCTCTTGAGAC       | GCAGGATCCTTCCATTGAGA      |
| <i>BIRC5</i>                    | GGACCACCGCATCTCTACAT      | GTCTGGCTCGTTCTCAGTGG      |
| <i>KLF4</i>                     | TTGCAGAGCTCAACAGGATG      | ATCAGCCACGGATACTGAA       |

**Table W2.** ChIP Primer Sequences.

| Name              | Forward Primer (5' to 3') | Reverse Primer (5' to 3') |
|-------------------|---------------------------|---------------------------|
| BAX-ChIP          | ACCCATGTAACACCATTTCAGA    | GGCAGAACTAATCTGTGCTGA     |
| BAX-CR (control)  | CCTGTGATCTATCAGCACAG      | GCTGGTCTCTGAACTCCCAGA     |
| ASK1-CHIP         | CAGCCCGCTCGTAAGGTG        | GGACGGAGCTTCCITTTCTT      |
| ASK1-CR (control) | CCCCCTCCCGTCTCTACTAA      | TGAGACGGAGTTTCGCTCTT      |
| MKK4-ChIP         | CAGCTGTCTGCTTCACAGGT      | GCCATTGTTGGGAGTGAAG       |
| MKK4-CR (control) | ATGCCCTAGGAGCAACAAGA      | GGCAAATTGAAGGTGAGAGC      |

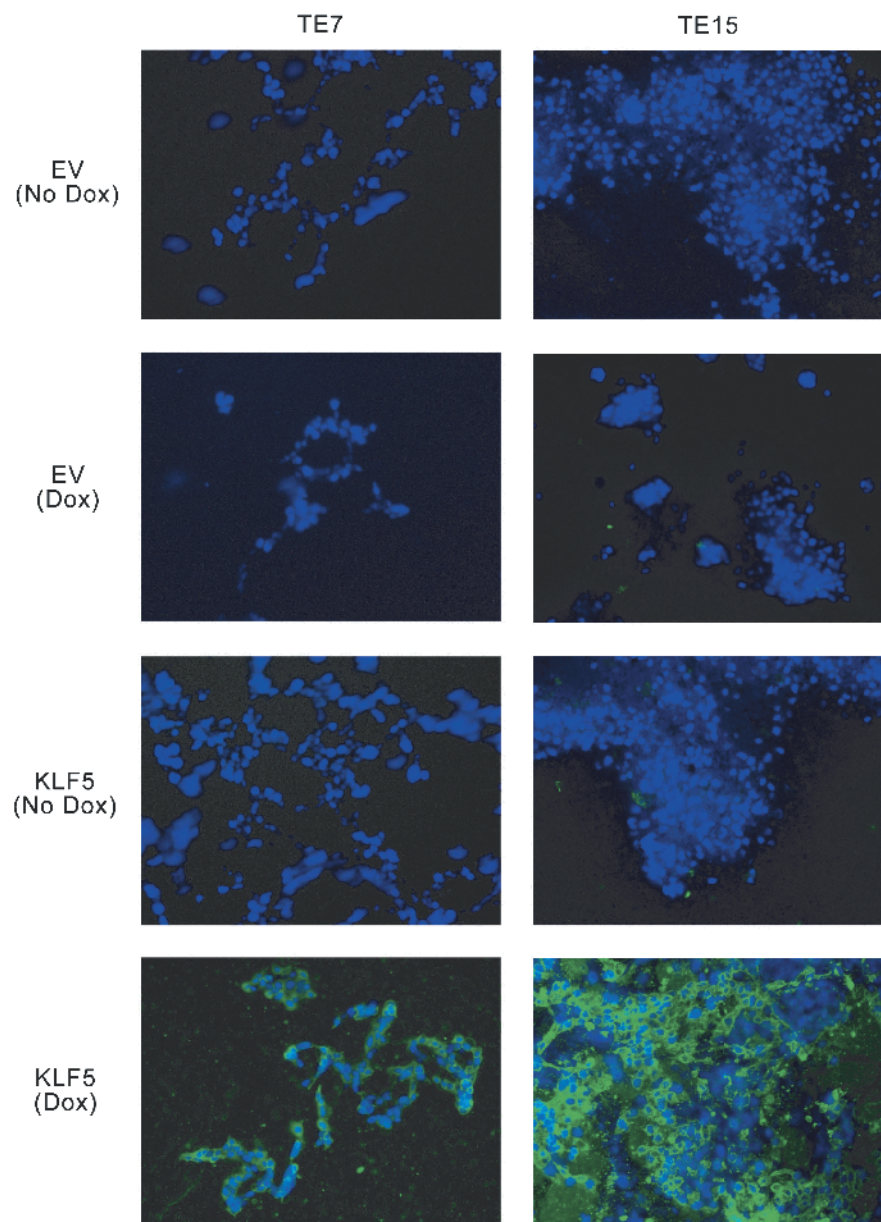

**Figure W1.** After 24 hours of *KLF5* induction, TE7 and TE15 cells demonstrated increased apoptosis, as indicated by annexin V staining (green), compared to EV and uninduced controls. Note the lack of necrotic cells, which stain with propidium iodide (red). Cells were counterstained with DAPI (blue). Original magnification,  $\times 400$ .

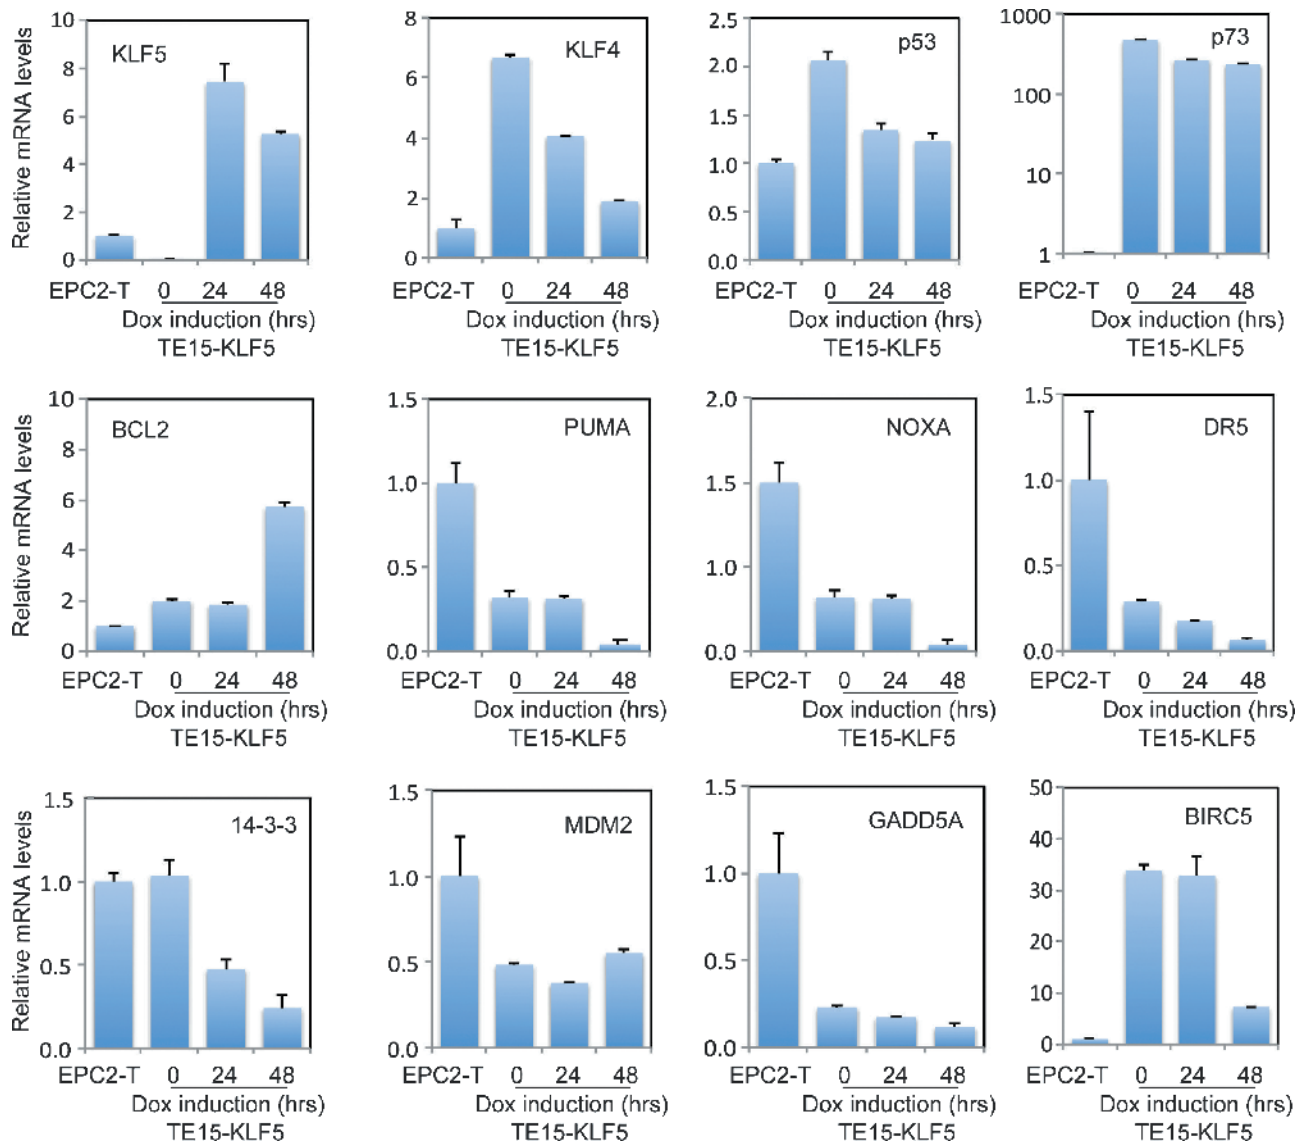

**Figure W2.** *KLF5* induction in TE15 cells altered mRNA expression of a broad array of apoptotic and survival factors, as assessed by qPCR. Nontransformed primary human esophageal keratinocytes (EPC-T cells) were included for comparison.

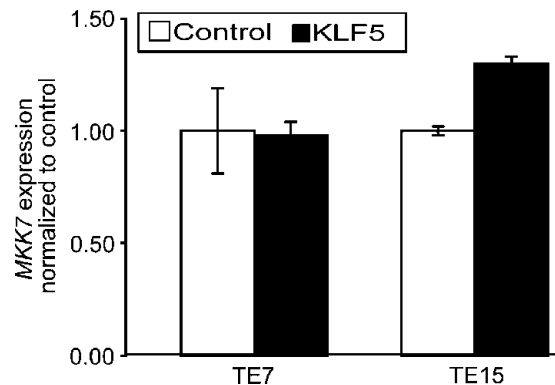

**Figure W3.** Induction of *KLF5* for 24 hours in TE7 and TE15 ESCC cells did not alter the expression of *MKK7* mRNA, as assessed by qPCR, demonstrating the specificity of *KLF5* for *MKK4*.
